# Supplementary material for: Depressive-like Behaviors Induced by mGluR5 Reduction in 6xTg in Mouse Model of Alzheimer’s Disease
Source: MDPI journal article supplement (doi:10.3390/ijms241613010), 2023-08-21
Supplement: s1 [file s1]

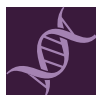

*Supplementary Materials*

# Depressive-like Behaviors Induced by mGluR5 Reduction in 6xTg in Mouse Model of Alzheimer's Disease

Youngkyo Kim <sup>1</sup>, Jinho Kim <sup>1</sup>, Shinwoo Kang <sup>2,3</sup> and Keun-A Chang <sup>1,2,4,\*</sup> 

<sup>1</sup> Department of Health Science and Technology, Gachon Advanced Institute for Health Sciences & Technology, Gachon University, Incheon 21999, Republic of Korea

<sup>2</sup> Department of Pharmacology, College of Medicine, Gachon University, Incheon 21999, Republic of Korea

<sup>3</sup> Department of Molecular Pharmacology and Experimental Therapeutics, Mayo Clinic, Rochester, VT 55905, USA

<sup>4</sup> Neuroscience Research Institute, Gachon University, Incheon 21565, Republic of Korea

\* Correspondence: keuna705@gachon.ac.kr

## Supplementary Figures

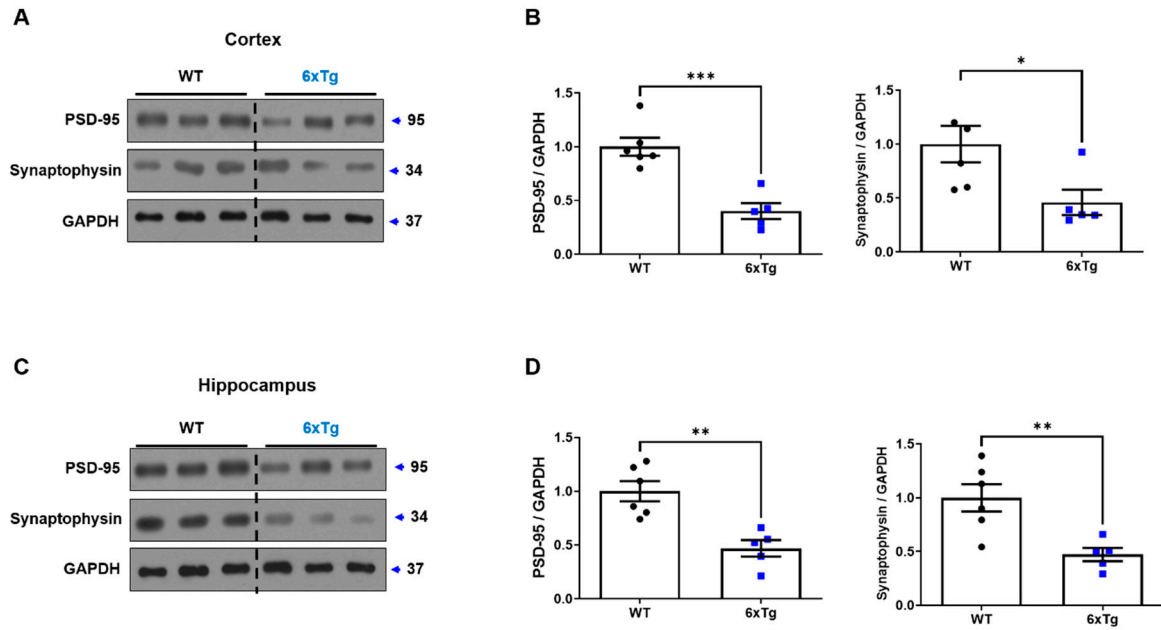

**Figure S1. Increased synaptic loss in 8-month-old 6xTg mice**

(A) Representative Western blot images depicting PSD-95 and synaptophysin protein levels in the cortex (CX) of 8-month-old WT and 6xTg brains. (B) Quantitative analysis of PSD-95 and synaptophysin expressions in the CX. (C) Representative Western blot images of PSD-95 and synaptophysin protein levels in the hippocampus (HP) of WT and 6xTg brains. (D) Quantitative analysis of PSD-95 and synaptophysin expressions in the HP. Data are presented as means  $\pm$  SEM ( $n = 5-6$  per group). \* $p < 0.05$ , \*\* $p < 0.01$ , \*\*\* $p < 0.001$  vs. WT. Statistical significance between the two groups was determined using the Student t-test.

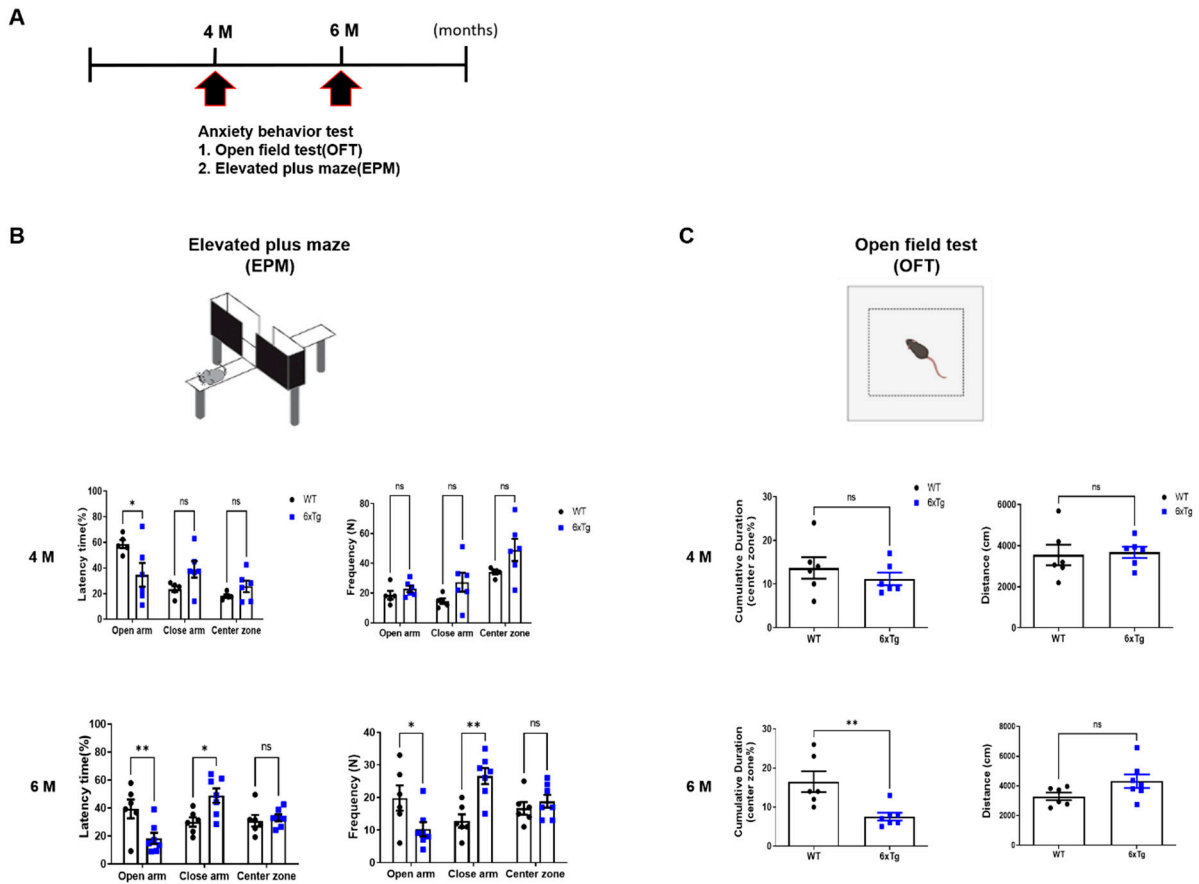

**Figure S2. Increased anxiety-like behavior in 6-month-old 6xTg mice.**

(A) The Elevated Plus Maze (EPM) and Open Field Test (OFT) were conducted to confirm anxiety-like behaviors according to the experimental schedule. (B) In Elevated Plus Maze (EPM) showed a significant increase in latency times in the closed arm starting from 4 months when comparing WT and 6xTg mice. Data are presented as means  $\pm$  SEM ( $n = 6-7$  per group).  $*p < 0.05$ ,  $**p < 0.01$  vs. WT by two-way ANOVA followed by Bonferroni's post hoc test. (C) In the Open Field Test (OFT), the 6xTg mice group at 6 months of age displayed significantly increased latency times in the center zone compared to WT mice, indicating higher levels of anxiety-like behavior. Data are presented as means  $\pm$  SEM ( $n = 6-7$  per group).  $**p < 0.01$  vs. WT. Statistical significance between the two groups was determined using the Student t-test.

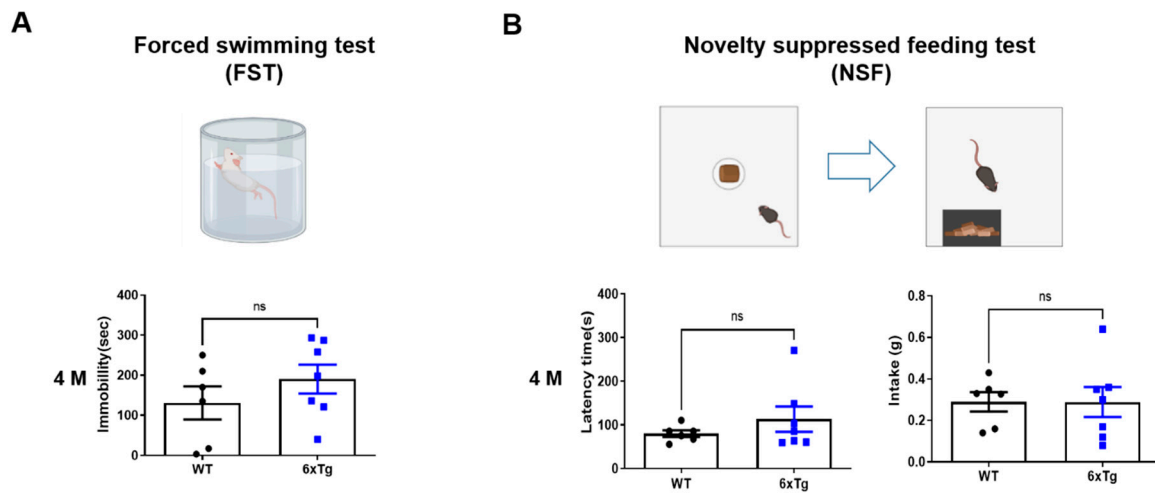

**Figure S3 Depressive-like behaviors in 4-month-old 6xTg mice.**

(A) The Forced swimming test (FST) and (B) novelty-suppressed feeding test (NSF) were conducted to confirm depressive-like behaviors. Data are presented as means  $\pm$  SEM ( $n=6-7$  per group). Statistical significance between the two groups was determined using the Student t-test.

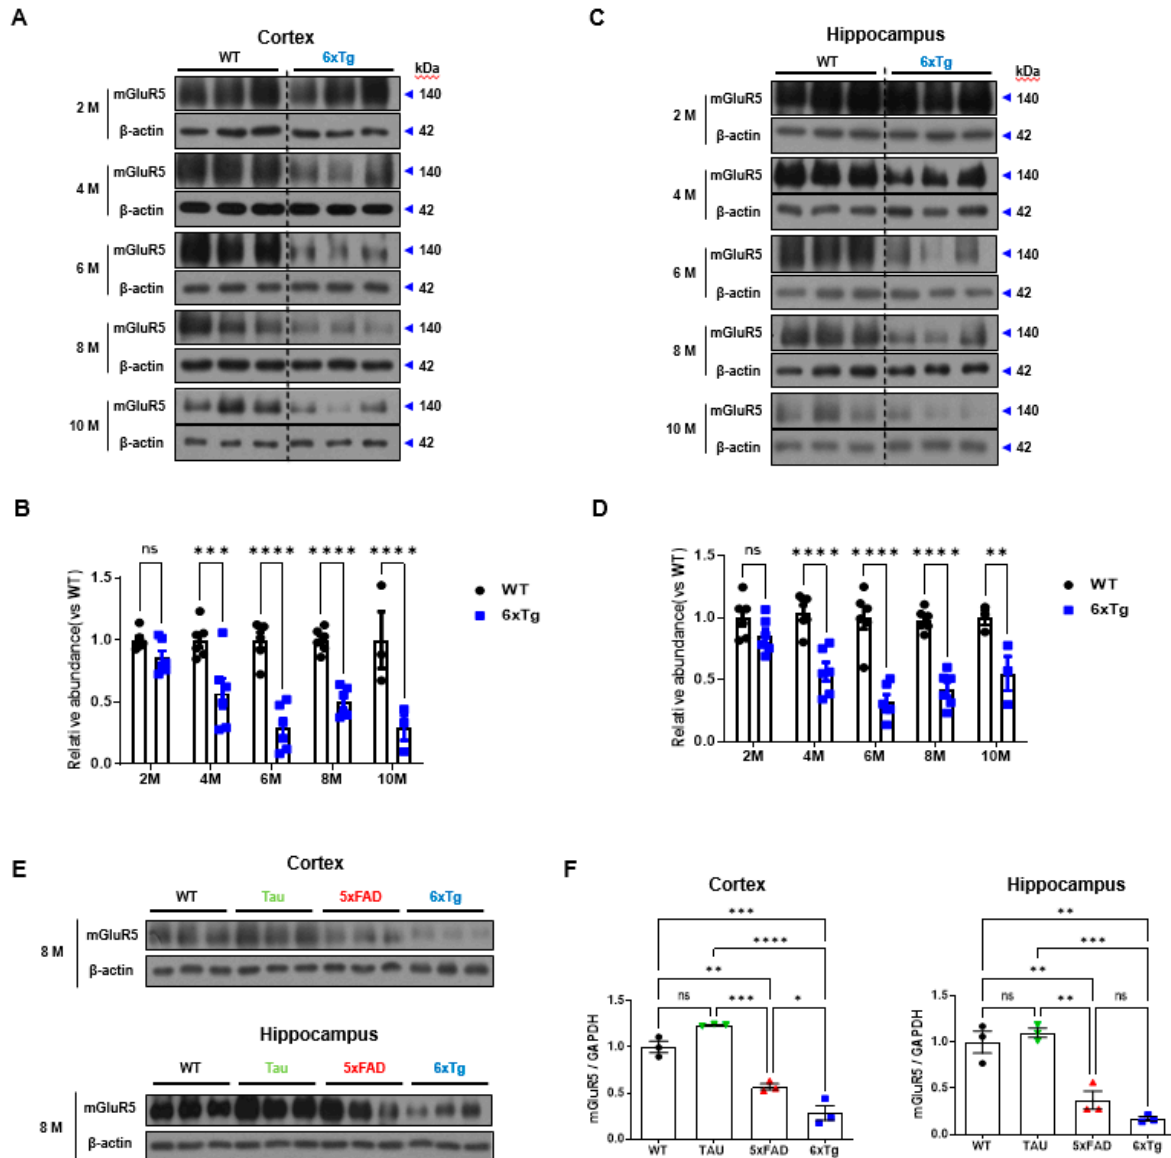

**Figure S4 Comparison of the protein levels of mGluR5 between the WT and 6xTg mice.**

(A) Representative Western blot image of mGluR5 protein levels in cortex of 2-, 4-, 6- and 8-month-old WT and 6xTg brain. (B) Quantitative analysis of mGluR5 expressions in the cortex. (C) Representative Western blot image of mGluR5 protein levels in hippocampus of 2-, 4-, 6- and 8-month-old WT and 6xTg brain. (D) Quantitative analysis of mGluR5 expressions in the hippocampus. Data are presented as means  $\pm$  SEM ( $n = 6$  per group). \*\* $p < 0.01$ , \*\*\* $p < 0.001$ , \*\*\*\* $p < 0.0001$  vs. WT by two-way ANOVA followed by Bonferroni's post hoc test (E) Representative Western blot images of mGluR5 protein levels in cortex and hippocampus of 8-month-old WT, Tau, 5xFAD and 6xTg mice. (F) Quantitative analysis of mGluR5 expressions in the cortex and hippocampus. Data are presented as means  $\pm$  SEM ( $n = 3-6$  per group). \*\* $p < 0.01$ , \*\*\* $p < 0.001$  vs. WT, \* $p < 0.05$ , \*\* $p < 0.01$ , \*\*\* $p < 0.001$ , \*\*\*\* $p < 0.0001$  vs. Tau, \* $p < 0.05$  vs 5xFAD by one-way ANOVA followed by Tukey's multiple comparisons test.

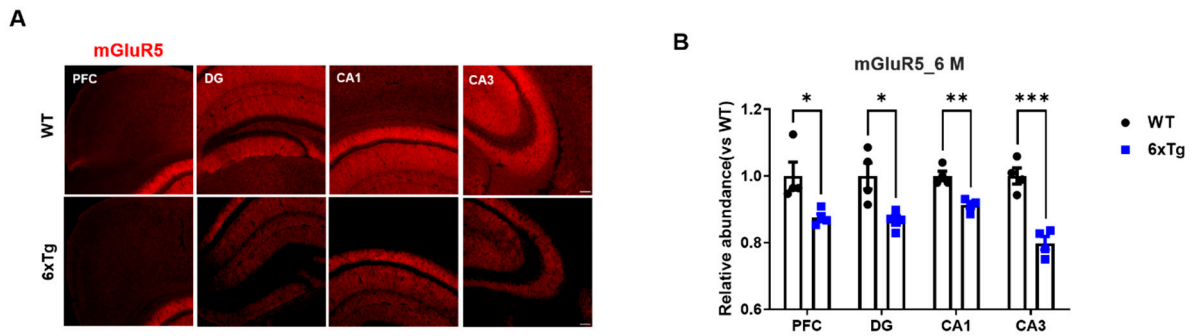

**Figure S5 Reduced GluR5 density in brains of 6-month-old 6xTg mice.**

(A) Representative IHC images of mGluR5 protein levels in the PFC, DG, CA1, and CA3 of 6-month-old WT and 6xTg brains. Scale bar 100µm (B) Quantitative analysis of mGluR5 expressions in the PFC, DG, CA1, and CA3. Data are presented as means ± SEM (n=3 per group). \* $p < 0.05$ , \*\* $p < 0.01$ , \*\*\* $p < 0.0001$  vs. WT. Statistical significance between the two groups was determined using the Student t-test.

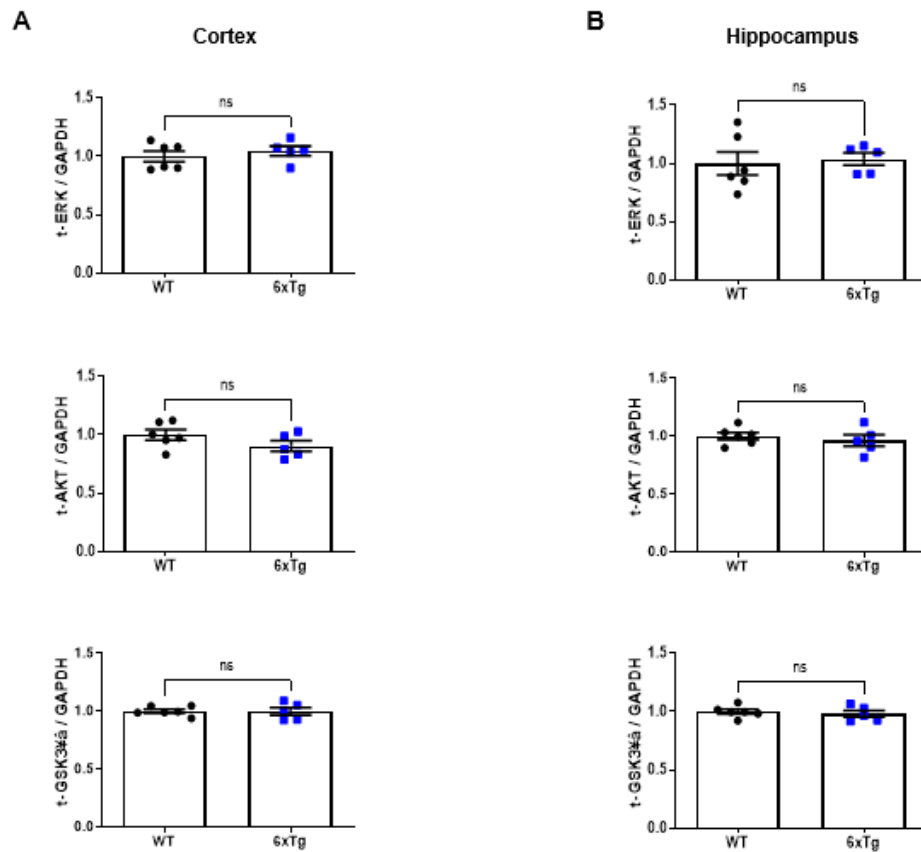

**Figure S6. Protein levels of t-ERK, t-AKT, and t-GSK3β in brains of 8-month-old 6xTg mice.**

(A) Quantitative analysis of t-ERK, t-AKT, and t-GSK3β expressions in the cortex (CX) of 8-month-old WT and 6xTg mice. (B) Quantitative analysis of t-ERK, t-AKT, and t-GSK3β expressions in the hippocampus (HP) of 8-month-old WT and 6xTg mice. Data are presented as means ± SEM (WT, n = 6; 6xTg, n = 6). Statistical significance between the two groups was determined using the Student t-test.
